# Supplementary material
Source: HighWire-hosted journal article supplement (https://erj.ersjournals.com/content/59/3/2102837)

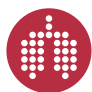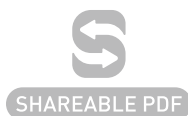

# Lung function during and after acute respiratory infection in COVID-19 positive and negative outpatients

Pekka Tamminen <sup>1,2</sup>, Dominik Kerimov <sup>3</sup>, Hanna Viskari <sup>1,4</sup>, Janne Aittoniemi<sup>3</sup>,  
Jaana Syrjänen <sup>1,4</sup> and Lauri Lehtimäki <sup>4,5</sup>

<sup>1</sup>Dept of Internal Medicine, Tampere University Hospital, Tampere, Finland. <sup>2</sup>Dept of Otorhinolaryngology – Head and Neck Surgery, Tampere University Hospital, Tampere, Finland. <sup>3</sup>Dept of Clinical Microbiology, Fimlab Laboratories, Tampere, Finland. <sup>4</sup>Faculty of Medicine and Health Technology, Tampere University, Tampere, Finland. <sup>5</sup>Allergy Centre, Tampere University Hospital, Tampere, Finland.

Corresponding author: Pekka Tamminen ([pekka.tamminen@tuni.fi](mailto:pekka.tamminen@tuni.fi))

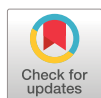

Shareable abstract (@ERSpublications)

**At acute phase, outpatients with mild COVID-19 had more symptoms, higher small airway resistance and poorer lung elasticity compared to outpatients with other respiratory infections, but there was no difference between the groups after 2 months** <https://bit.ly/3nalPye>

**Cite this article as:** Tamminen P, Kerimov D, Viskari H, et al. Lung function during and after acute respiratory infection in COVID-19 positive and negative outpatients. *Eur Respir J* 2022; 59: 2102837 [DOI: 10.1183/13993003.02837-2021].

This single-page version can be shared freely online.

Copyright ©The authors 2022.

This version is distributed under the terms of the Creative Commons Attribution Non-Commercial Licence 4.0. For commercial reproduction rights and permissions contact [permissions@ersnet.org](mailto:permissions@ersnet.org)

Received: 1 Nov 2021  
Accepted: 21 Dec 2021

*To the Editor:*

Severe acute respiratory syndrome coronavirus 2 (SARS-CoV-2) has been associated with prolonged post-acute symptoms in at least 10% of patients [1, 2]. The majority of published data evaluates hospitalised patients with severe SARS-CoV-2 disease (COVID-19) with symptoms and pulmonary function defects several months after discharge [1]. Most of the infected subjects develop mild symptoms and are treated as outpatients. Though they are also reported to suffer from prolonged symptoms, their lung function is studied far less. Furthermore, the prolonged symptoms and objectively measurable findings are usually not compared to a group suffering from airway infection caused by other pathogens [2]. As spirometry and other aerosol-producing procedures are minimised during the pandemic, there are no reports on lung function during acute COVID-19.

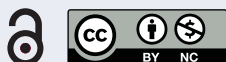

Supplement: inline-supplementary-material-1 [file inline-supplementary-material-1.pdf]
